# Supplementary material
Source: HighWire-hosted journal article supplement (https://www.qdcxjkg.com/highwire/filestream/114020/field_highwire_adjunct_files/5/erj00180-2013_online_supplementary_tables_S1-S3.pdf)
Supplement: erj00180-2013_online_supplementary_tables_S1-S3.pdf [file erj00180-2013_online_supplementary_tables_S1-S3.pdf]

**Table S1 (online only):** Antibodies used in this study.

| <b>Antibody</b>                       | <b>Company</b> | <b>Clone</b> | <b>Pretreatment</b> | <b>Dilution</b> | <b>Incubation</b> |
|---------------------------------------|----------------|--------------|---------------------|-----------------|-------------------|
| Cytokeratin 7 (CK7)                   | Dako           | OV-TL 12     | pH 6                | 1:50            | 30 min            |
| Thyroid Transcription Factor 1 (TTF1) | Novocastra     | SPT 24       | pH 9                | 1:100           | 30 min            |
| Napsin A                              | Novocastra     | IP 64        | pH 6                | 1:400           | 30 min            |
| ERCC1                                 | Labvision      | 8F1          | pH9                 | 1:100           | 30 min            |
| Thymidylate Synthase (TS)             | Dako           | TS 106       | pH6                 | 1:75            | 30 min            |
| Anaplastic Lymphoma Kinase (ALK)      | CellSignaling  | D5F3         | pH9                 | 1:100           | 30 min            |

**Table S2 (online only):** Correlation of diagnostic immunomarkers with overall (OS) and disease free survival (DFS).

|                             | Overall survival |        |                   |                |         | Disease free survival |        |                   |                |         |
|-----------------------------|------------------|--------|-------------------|----------------|---------|-----------------------|--------|-------------------|----------------|---------|
|                             | Cases            | Events | Survival (months) | Standard error | p-value | Cases                 | Events | Survival (months) | Standard error | p-value |
| <b>CK7</b>                  |                  |        |                   |                |         |                       |        |                   |                |         |
| <i>without chemotherapy</i> |                  |        |                   |                |         |                       |        |                   |                |         |
| negative                    | 9                | 4      | 43,2              | 6,6            | 0,985   | 9                     | 5      | 31,2              | 8,6            | 0,374   |
| positive                    | 304              | 131    | 63,6              | 2,7            |         | 304                   | 123    | 60,5              | 2,9            |         |
| <i>with chemotherapy</i>    |                  |        |                   |                |         |                       |        |                   |                |         |
| negative                    | 5                | 1      | 54,9              | 8,7            | 0,367   | 5                     | 2      | 41,5              | 11,3           | 0,515   |
| positive                    | 100              | 40     | 53,7              | 4,1            |         | 100                   | 54     | 41,9              | 3,9            |         |
| <i>without radiotherapy</i> |                  |        |                   |                |         |                       |        |                   |                |         |
| negative                    | 10               | 4      | 48,5              | 6,3            | 0,943   | 10                    | 6      | 29,9              | 7,8            | 0,215   |
| positive                    | 336              | 127    | 67,5              | 2,6            |         | 336                   | 133    | 62,0              | 2,8            |         |
| <i>with radiotherapy</i>    |                  |        |                   |                |         |                       |        |                   |                |         |
| negative                    | 4                | 1      | 48,1              | 12,1           | 0,266   | 4                     | 1      | 47,4              | 12,7           | 0,162   |
| positive                    | 68               | 44     | 42,8              | 5,0            |         | 68                    | 44     | 32,0              | 4,1            |         |
| <b>TTF1</b>                 |                  |        |                   |                |         |                       |        |                   |                |         |
| <i>without chemotherapy</i> |                  |        |                   |                |         |                       |        |                   |                |         |
| negative                    | 37               | 20     | 45,3              | 7,2            | 0,016   | 37                    | 17     | 45,6              | 8,1            | 0,081   |
| positive                    | 276              | 115    | 65,3              | 2,8            |         | 276                   | 110    | 61,7              | 3,1            |         |
| <i>with chemotherapy</i>    |                  |        |                   |                |         |                       |        |                   |                |         |
| negative                    | 15               | 6      | 55,0              | 9,9            | 0,853   | 15                    | 9      | 36,4              | 9,6            | 0,38    |
| positive                    | 90               | 35     | 49,1              | 3,1            |         | 90                    | 47     | 39,3              | 3,2            |         |
| <i>without radiotherapy</i> |                  |        |                   |                |         |                       |        |                   |                |         |
| negative                    | 44               | 19     | 55,3              | 6,7            | 0,116   | 44                    | 21     | 47,4              | 7,0            | 0,07    |
| positive                    | 303              | 113    | 68,3              | 2,7            |         | 303                   | 118    | 63,0              | 2,9            |         |
| <i>with radiotherapy</i>    |                  |        |                   |                |         |                       |        |                   |                |         |
| negative                    | 8                | 7      | 20,0              | 6,7            | 0,034   | 8                     | 5      | 12,1              | 2,0            | 0,108   |
| positive                    | 63               | 37     | 47,3              | 5,4            |         | 63                    | 39     | 35,9              | 4,5            |         |
| <b>Napsin</b>               |                  |        |                   |                |         |                       |        |                   |                |         |
| <i>without chemotherapy</i> |                  |        |                   |                |         |                       |        |                   |                |         |
| negative                    | 79               | 38     | 56,7              | 5,3            | 0,1     | 79                    | 37     | 52,5              | 5,7            | 0,1     |
| positive                    | 235              | 97     | 65,7              | 3,0            |         | 235                   | 91     | 62,7              | 3,3            |         |
| <i>with chemotherapy</i>    |                  |        |                   |                |         |                       |        |                   |                |         |
| negative                    | 24               | 10     | 55,2              | 7,4            | 0,944   | 24                    | 14     | 39,4              | 7,8            | 0,401   |
| positive                    | 82               | 32     | 48,7              | 3,3            |         | 82,0                  | 42     | 39,5              | 3,4            |         |
| <i>without radiotherapy</i> |                  |        |                   |                |         |                       |        |                   |                |         |
| negative                    | 88               | 37     | 62,1              | 5,1            | 0,248   | 88                    | 41     | 54,3              | 5,4            | 0,054   |
| positive                    | 260              | 95     | 68,7              | 3,0            |         | 260                   | 98     | 63,8              | 3,2            |         |
| <i>with radiotherapy</i>    |                  |        |                   |                |         |                       |        |                   |                |         |
| negative                    | 15               | 11     | 28,9              | 7,1            | 0,134   | 15                    | 10     | 28,0              | 7,0            | 0,393   |
| positive                    | 57               | 34     | 46,8              | 5,6            |         | 57                    | 35     | 35,2              | 4,8            |         |

**Table S3 (online only):** Correlation of predictive biomarkers with overall (OS) and disease free survival (DFS).

|                             | Overall survival |        |                   |                |         | Disease free survival |        |                   |                |         |
|-----------------------------|------------------|--------|-------------------|----------------|---------|-----------------------|--------|-------------------|----------------|---------|
|                             | Cases            | Events | Survival (months) | Standard error | p-value | Cases                 | Events | Survival (months) | Standard error | p-value |
| <b>ERCC1</b>                |                  |        |                   |                |         |                       |        |                   |                |         |
| <i>without chemotherapy</i> |                  |        |                   |                |         |                       |        |                   |                |         |
| below mean                  | 147              | 66     | 60,5              | 4,0            | 0,153   | 147                   | 67     | 53,5              | 4,3            | 0,024   |
| above mean                  | 141              | 57     | 66,6              | 3,8            |         | 141                   | 52     | 64,7              | 4,2            |         |
| <i>with chemotherapy</i>    |                  |        |                   |                |         |                       |        |                   |                |         |
| below mean                  | 51               | 18     | 57,6              | 5,3            | 0,172   | 51                    | 27     | 44,3              | 5,3            | 0,629   |
| above mean                  | 45               | 22     | 41,3              | 3,9            |         | 45                    | 26     | 34,3              | 4,0            |         |
| <i>without radiotherapy</i> |                  |        |                   |                |         |                       |        |                   |                |         |
| below mean                  | 170              | 67     | 65,2              | 3,8            | 0,303   | 170                   | 74     | 56,4              | 3,9            | 0,096   |
| above mean                  | 150              | 56     | 68,7              | 3,7            |         | 150                   | 57     | 64,4              | 4,1            |         |
| <i>with radiotherapy</i>    |                  |        |                   |                |         |                       |        |                   |                |         |
| below mean                  | 28               | 17     | 45,4              | 8,0            | 0,941   | 28                    | 20     | 28,1              | 5,9            | 0,395   |
| above mean                  | 36               | 23     | 38,1              | 5,0            |         | 36                    | 21     | 31,8              | 4,1            |         |
| <b>TS</b>                   |                  |        |                   |                |         |                       |        |                   |                |         |
| <i>without chemotherapy</i> |                  |        |                   |                |         |                       |        |                   |                |         |
| below mean                  | 147              | 70     | 55,6              | 3,9            | 0,008   | 147                   | 69     | 50,7              | 4,3            | <0.001  |
| above mean                  | 144              | 51     | 71,8              | 3,9            |         | 144                   | 44     | 70,6              | 4,3            |         |
| <i>with chemotherapy</i>    |                  |        |                   |                |         |                       |        |                   |                |         |
| below mean                  | 61               | 25     | 51,3              | 5,1            | 0,304   | 61                    | 33     | 40,7              | 5,0            | 0,418   |
| above mean                  | 43               | 15     | 49,7              | 3,7            |         | 43                    | 22     | 39,4              | 4,1            |         |
| <i>without radiotherapy</i> |                  |        |                   |                |         |                       |        |                   |                |         |
| below mean                  | 173              | 72     | 60,0              | 3,7            | 0,005   | 173                   | 77     | 53,6              | 4,0            | 0,001   |
| above mean                  | 156              | 48     | 76,1              | 3,7            |         | 156                   | 51     | 70,0              | 4,1            |         |
| <i>with radiotherapy</i>    |                  |        |                   |                |         |                       |        |                   |                |         |
| below mean                  | 35               | 23     | 38,9              | 5,4            | 0,632   | 35                    | 25     | 29,3              | 5,1            | 0,154   |
| above mean                  | 31               | 18     | 50,6              | 7,9            |         | 31                    | 15     | 38,7              | 5,0            |         |
| <b>KRAS</b>                 |                  |        |                   |                |         |                       |        |                   |                |         |
| <i>without chemotherapy</i> |                  |        |                   |                |         |                       |        |                   |                |         |
| wt                          | 204              | 90     | 63,4              | 3,2            | 0,946   | 204                   | 81     | 62,2              | 3,5            | 0,318   |
| mutated                     | 114              | 47     | 61,3              | 4,2            |         | 114                   | 48     | 54,4              | 4,6            |         |
| <i>with chemotherapy</i>    |                  |        |                   |                |         |                       |        |                   |                |         |
| wt                          | 61               | 21     | 57,7              | 5,2            | 0,158   | 61                    | 33     | 43,9              | 4,8            | 0,833   |
| mutated                     | 46               | 21     | 45,1              | 4,4            |         | 46                    | 23     | 38,6              | 4,8            |         |
| <i>without radiotherapy</i> |                  |        |                   |                |         |                       |        |                   |                |         |
| wt                          | 218              | 84     | 67,6              | 3,2            | 0,808   | 218                   | 87     | 62,7              | 3,4            | 0,509   |
| mutated                     | 134              | 49     | 64,7              | 3,9            |         | 134                   | 53     | 57,5              | 4,3            |         |
| <i>with radiotherapy</i>    |                  |        |                   |                |         |                       |        |                   |                |         |
| wt                          | 47               | 27     | 48,1              | 6,4            | 0,185   | 47                    | 27     | 39,1              | 5,6            | 0,145   |
| mutated                     | 26               | 19     | 32,6              | 5,6            |         | 26                    | 18     | 25,0              | 4,8            |         |
| <b>BRAF</b>                 |                  |        |                   |                |         |                       |        |                   |                |         |
| <i>without chemotherapy</i> |                  |        |                   |                |         |                       |        |                   |                |         |
| wt                          | 304              | 129    | 64,1              | 2,7            | 0,341   | 304                   | 118    | 62,5              | 2,9            | 0,003   |
| mutated                     | 14               | 8      | 52,2              | 11,7           |         | 14                    | 11     | 26,8              | 6,7            |         |
| <i>with chemotherapy</i>    |                  |        |                   |                |         |                       |        |                   |                |         |
| wt                          | 104              | 41     | 54,3              | 4,0            | 0,956   | 104                   | 54     | 44,2              | 3,8            | 0,862   |
| mutated                     | 3                | 1      | 42,9              | 14,5           |         | 3                     | 2      | 41,1              | 19,3           |         |
| <i>without radiotherapy</i> |                  |        |                   |                |         |                       |        |                   |                |         |
| wt                          | 339              | 125    | 68,4              | 2,6            | 0,035   | 339                   | 131    | 63,3              | 2,8            | 0,009   |
| mutated                     | 13               | 8      | 41,1              | 9,9            |         | 13                    | 9      | 26,0              | 6,6            |         |
| <i>with radiotherapy</i>    |                  |        |                   |                |         |                       |        |                   |                |         |
| wt                          | 69               | 45     | 39,0              | 4,2            | 0,116   | 69                    | 41     | 35,7              | 4,7            | 0,947   |
| mutated                     | 4                | 1      | 79,3              | 21,2           |         | 4                     | 4      | 35,8              | 15,0           |         |
| <b>EGFR</b>                 |                  |        |                   |                |         |                       |        |                   |                |         |
| <i>without chemotherapy</i> |                  |        |                   |                |         |                       |        |                   |                |         |
| wt                          | 265              | 111    | 64,7              | 2,9            | 0,414   | 265                   | 102    | 62,2              | 3,2            | 0,096   |
| mutated                     | 53               | 26     | 57,2              | 6,1            |         | 53                    | 27     | 51,0              | 7,1            |         |
| <i>with chemotherapy</i>    |                  |        |                   |                |         |                       |        |                   |                |         |
| wt                          | 94               | 39     | 47,7              | 3,0            | 0,303   | 94                    | 52     | 37,3              | 3,1            | 0,174   |
| mutated                     | 13               | 3      | 67,5              | 9,6            |         | 13                    | 4      | 62,2              | 10,3           |         |
| <i>without radiotherapy</i> |                  |        |                   |                |         |                       |        |                   |                |         |
| wt                          | 301              | 111    | 68,2              | 2,8            | 0,606   | 301                   | 120    | 61,6              | 3,0            | 0,804   |
| mutated                     | 51               | 22     | 62,7              | 6,2            |         | 51                    | 20     | 62,5              | 7,3            |         |
| <i>with radiotherapy</i>    |                  |        |                   |                |         |                       |        |                   |                |         |
| wt                          | 58               | 39     | 42,5              | 5,2            | 0,613   | 58                    | 34     | 37,3              | 4,7            | 0,047   |
| mutated                     | 15               | 7      | 39,2              | 7,5            |         | 15                    | 11     | 20,2              | 5,6            |         |
